# Supplementary material
Source: PubMed Central journal article supplement (PMC7500894)
Supplement: mmc1.pdf [file mmc1.pdf]

# THE LANCET

## Child & Adolescent Health

### Supplementary appendix

This appendix formed part of the original submission We post it as supplied by the authors.

Supplement to: Britton PN, Hu N, Saravanos V, et al. COVID-19 public health measures and respiratory syncytial virus. *Lancet Child Adolesc Health* 2020; published online September 18, 2020. [https://doi.org/10.1016/S2352-4642\(20\)30307-2](https://doi.org/10.1016/S2352-4642(20)30307-2)

**Web appendix – Britton PN et al. Impact of COVID-19 public health measures on RSV-associated hospital attendance among children in Sydney, Australia.**

**Figure 1:** Panelled line graphs showing the monthly frequency of RSV PCR detections (A), ICD-10 coded\* Bronchiolitis admissions (B), and SNOMED CT coded\* Emergency Department acute respiratory presentations (C) 2014-19 and January to June 2020 aligned with the elements of the NSW and Australian COVID-19 pandemic response (D; amended from Macartney et al. 2020(9)).

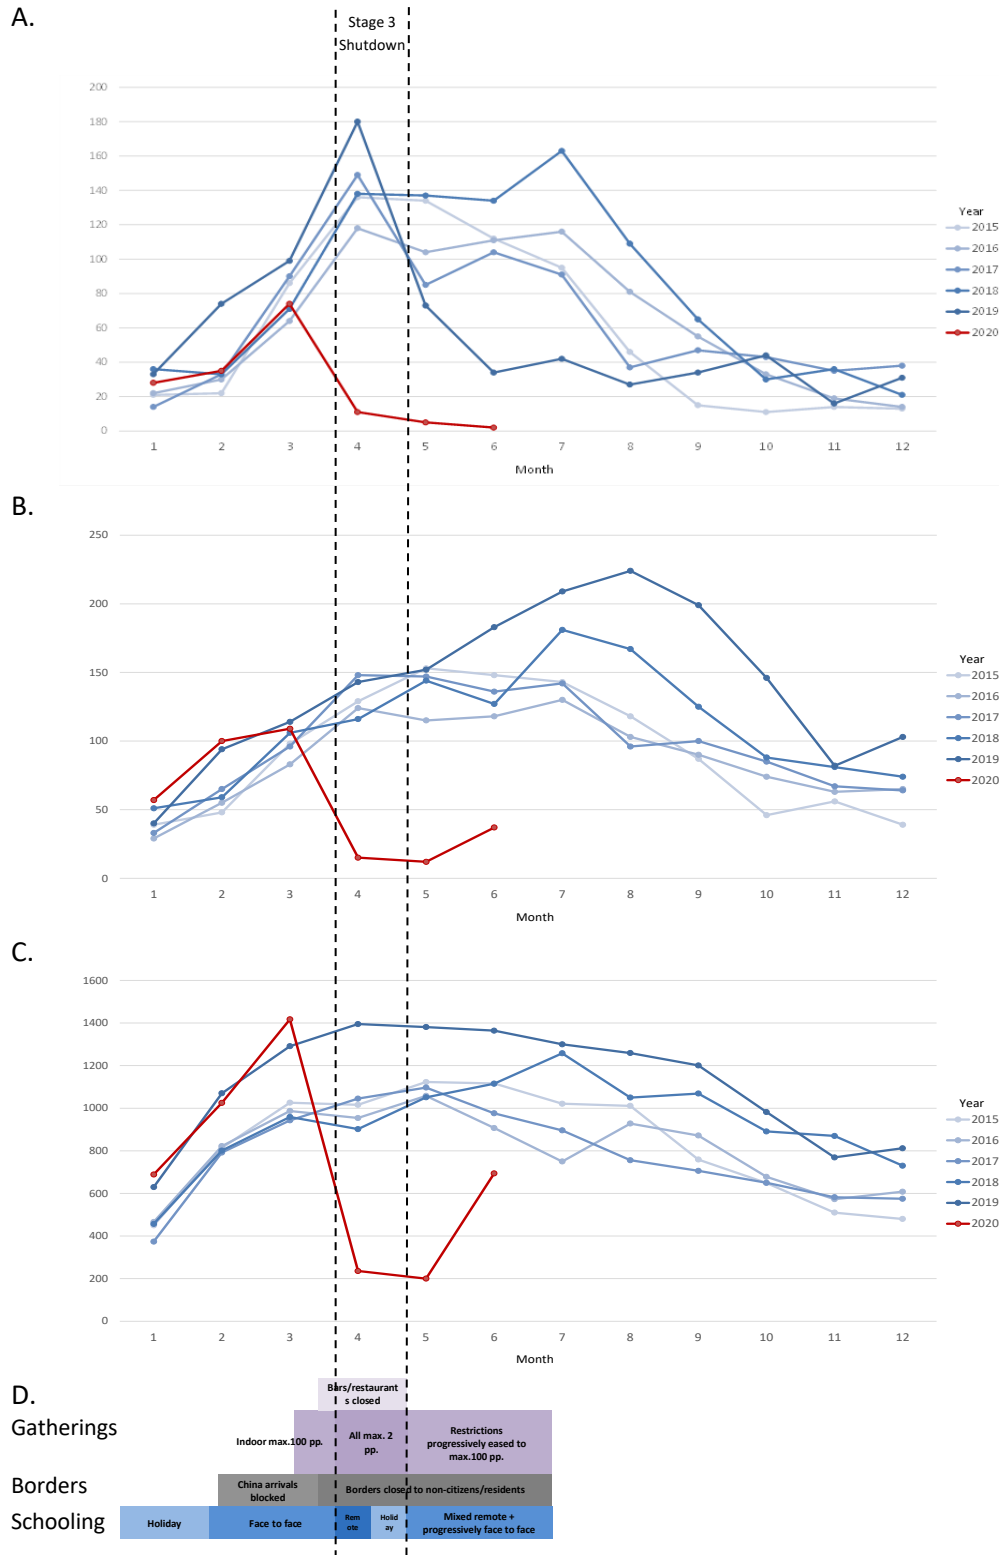

\*ICD-10-AM codes: J21.0, J21.1, J21.8, J21.9. SNOMED CT codes: 281794004, 56018004, 54150009, 4120002, 5505005, 233604007, 195967001, 50417007, 49727002, 385093006. See supplementary materials for specific diagnoses.

**Web appendix – Britton PN et al. Impact of COVID-19 public health measures on RSV-associated hospital attendance among children in Sydney, Australia.**

**Figure 2:** Observed and predicted trends of the frequency of RSV PCR detections, ICD-10-AM coded Bronchiolitis admissions, and SNOMED CT-coded Emergency Department acute respiratory attendances 2015 to 2020; **2a.** All aged <16 years and **2b.** Sub-group aged ≤2 years and **2c.** Table showing observed and predicted counts.

**2a.**

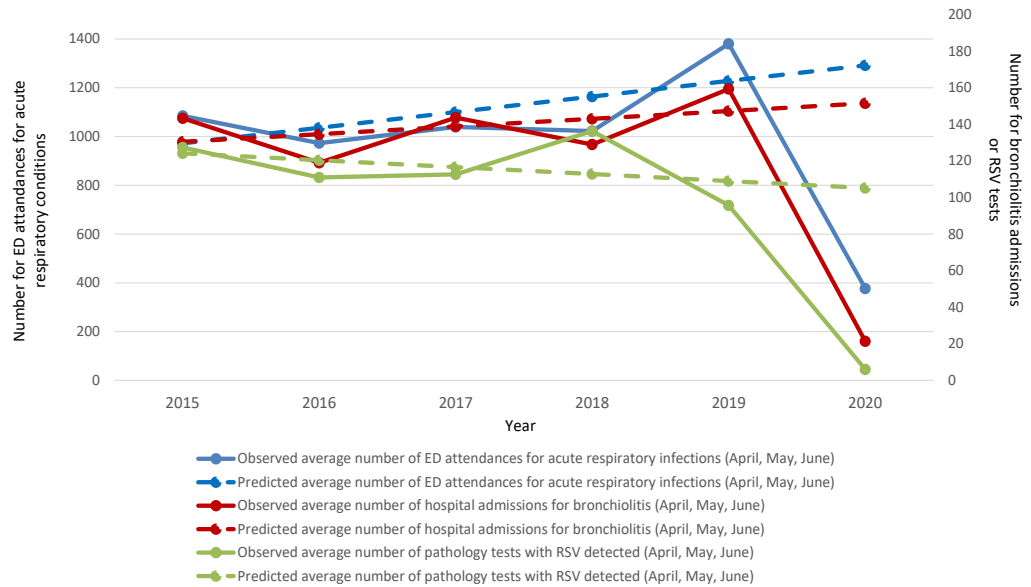

**2b.**

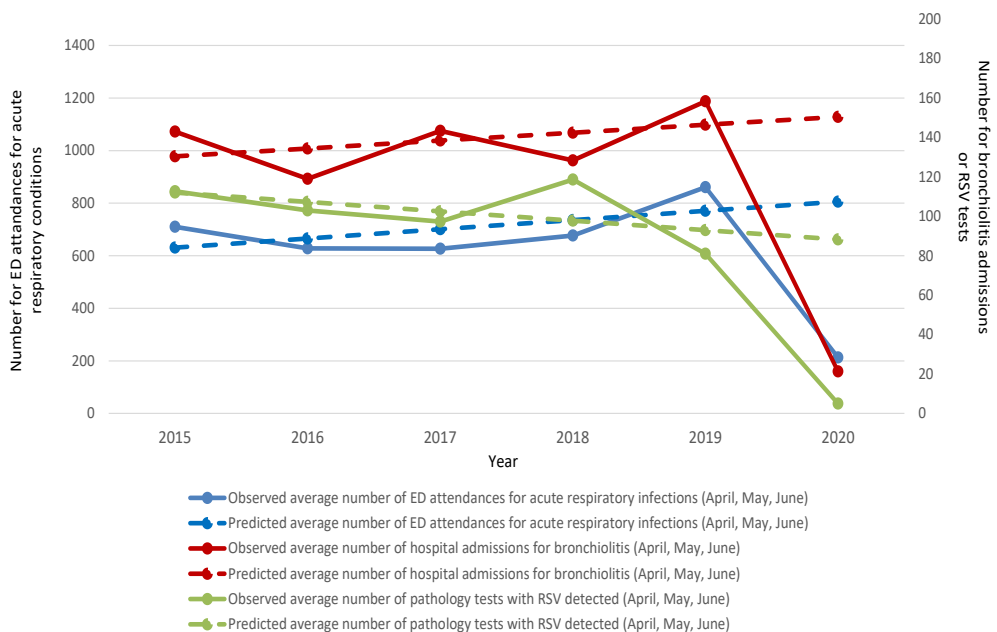

**Web appendix – Britton PN et al. Impact of COVID-19 public health measures on RSV-associated hospital attendance among children in Sydney, Australia.**

**2c.**

|                                                          | Average number across April, May and June in 2020 |           | Difference between observed and predicted values |                            |                        |
|----------------------------------------------------------|---------------------------------------------------|-----------|--------------------------------------------------|----------------------------|------------------------|
|                                                          | Observed                                          | Predicted | Absolute difference (SE)                         | Percentage difference (SE) | P value for difference |
| <b>Children &lt; 16 years of age</b>                     |                                                   |           |                                                  |                            |                        |
| ED attendance for acute respiratory infections (2015-19) | 377                                               | 1292      | -915 (211)                                       | -70.8% (16.3%)             | 0.023                  |
| Non-admitted only                                        | 219                                               | 753       | -534 (192)                                       | -70.9% (25.5%)             | 0.069                  |
| Hospital admissions for bronchiolitis (2015-19)          | 21                                                | 151       | -130 (23)                                        | -85.9% (15.2%)             | 0.011                  |
| ICU                                                      | 2                                                 | 18        | -16 (6)                                          | -89.1% (32.7%)             | 0.074                  |
| Mechanical ventilation                                   | 1                                                 | 4         | -4 (2)                                           | -85.1% (44.8%)             | 0.115                  |
| Pathology tests with RSV detected (2015-19)              | 6                                                 | 105       | -99 (24)                                         | -94.3% (22.8%)             | 0.026                  |
| <b>Children ≤ 2 years of age</b>                         |                                                   |           |                                                  |                            |                        |
| ED attendance for acute respiratory infections (2015-19) | 213                                               | 806       | -593 (132)                                       | -73.6% (16.4%)             | 0.021                  |
| Non-admitted only                                        | 135                                               | 464       | -328 (106)                                       | -70.8% (22.9%)             | 0.054                  |
| Hospital admissions for bronchiolitis (2015-19)          | 21                                                | 150       | -129 (23)                                        | -85.8% (15.3%)             | 0.011                  |
| Pathology tests with RSV detected (2015-19)              | 5                                                 | 88        | -83 (21)                                         | -94.3% (23.8%)             | 0.029                  |

**Table 1:** Diagnostic codes used to extract hospitalisation and ED attendance data; **a.** International Statistical Classification of Diseases and Related Health Problems, Tenth Revision, Australian Modification (ICD-10-AM) discharge codes, **b.** Systematized Nomenclature of Medicine Clinical Terms (SNOMED CT) diagnosis codes.

**1a.**

| *ICD-10-AM diagnosis code | Diagnosis                                              |
|---------------------------|--------------------------------------------------------|
| J21.0                     | Acute bronchiolitis due to respiratory syncytial virus |
| J21.1                     | Acute bronchiolitis due to human metapneumovirus       |
| J21.8                     | Acute bronchiolitis due to other specified organisms   |
| J21.9                     | Acute bronchiolitis unspecified                        |

**1b.**

| *SNOMED CT code | Diagnosis                                          |
|-----------------|----------------------------------------------------|
| 281794004       | Viral upper respiratory tract infection (disorder) |
| 56018004        | Wheezing (finding)                                 |
| 54150009        | Upper respiratory infection (disorder)             |
| 4120002         | Bronchiolitis (disorder)                           |
| 5505005         | Acute bronchiolitis (disorder)                     |
| 233604007       | Pneumonia (disorder)                               |
| 195967001       | Asthma (disorder)                                  |
| 50417007        | Lower respiratory tract infection (disorder)       |
| 49727002        | Cough (finding)                                    |
| 385093006       | Community acquired pneumonia (disorder)            |

**Web appendix – Britton PN et al. Impact of COVID-19 public health measures on RSV-associated hospital attendance among children in Sydney, Australia.**

**Table 2:** Age distributions of the three datasets: **2a.** RSV PCR detections, **2b.** ICD-10-AM coded Bronchiolitis admissions, and **2c.** SNOMED CT-coded Emergency Department acute respiratory attendances 2015 to 2020.

**2a.**

| Age (years) | Frequency | Percent |
|-------------|-----------|---------|
| 0           | 26832     | 38.53   |
| 1           | 11686     | 16.78   |
| 2           | 5868      | 8.43    |
| 0- 2        | 44386     | 63.73   |
| 3           | 4492      | 6.45    |
| 4           | 3666      | 5.26    |
| 5           | 2776      | 3.99    |
| 6           | 2238      | 3.21    |
| 7           | 1850      | 2.66    |
| 8           | 1626      | 2.33    |
| 9           | 1396      | 2.00    |
| 10          | 1344      | 1.93    |
| 11          | 1244      | 1.79    |
| 12          | 1326      | 1.90    |
| 13          | 1186      | 1.70    |
| 14          | 1114      | 1.60    |
| 15          | 1002      | 1.44    |
| 3 - 15      | 25260     | 36.27   |

**2b.**

| Admission age (years) | Frequency | Percent |
|-----------------------|-----------|---------|
| 0                     | 5490      | 81.56   |
| 1                     | 1146      | 17.03   |
| 2                     | 67        | 1       |
| 0 - 2                 | 6703      | 99.60   |
| 3                     | 12        | 0.18    |
| 4                     | 6         | 0.09    |
| 5                     | 1         | 0.01    |
| 6                     | 0         |         |
| 7                     | 3         | 0.04    |
| 8                     | 2         | 0.03    |
| 9                     | 0         |         |
| 10                    | 1         | 0.01    |
| 11                    | 0         |         |
| 12                    | 1         | 0.01    |
| 13                    |           |         |
| 14                    |           |         |
| 15                    |           |         |
| 3 – 15                | 27        | 0.40    |
| missing               | 1         | 0.01    |

**2c.**

| Age category (years) | Frequency | Percent |
|----------------------|-----------|---------|
| ≤ 2                  | 37158     | 63.38   |
| 3 – 15               | 21333     | 36.39   |
| ≥ 16                 | 138       | 0.24    |
